# Supplementary material for: Alkali metal cation doped Al-SBA-15 for carbon dioxide adsorption
Source: Royal Society of Chemistry journal article supplement (doi:10.1039/b924938a), 2010-01-01
Supplement: b924938a.pdf [file b924938a.pdf]

Alkali metal cation doped Al-SBA-15 for carbon dioxide adsorption: Electronic supplementary information

Arnošt Zukal, Jana Mayerová and Jiří Čejka\*

*J. Heyrovský Institute of Physical Chemistry, Academy of Sciences of the Czech*

*Republic, v.v.i., Dolejškova 3, CZ-182 23 Prague 8, Czech Republic. E-mail:*

[jiri.cejkal@jh-inst.cas.cz](mailto:jiri.cejkal@jh-inst.cas.cz)

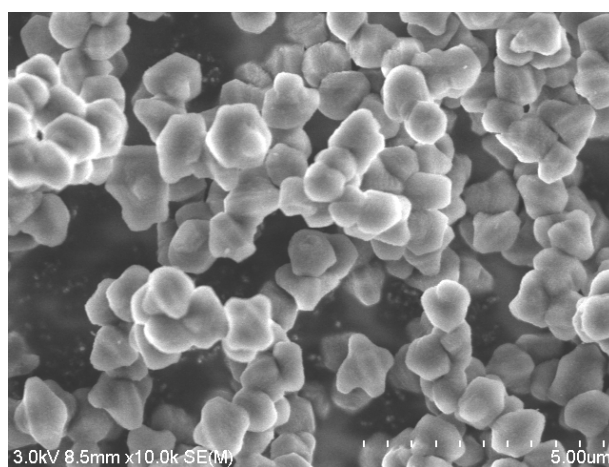

**Figure S1.** Scanning electron image of starting sample SBA-15.

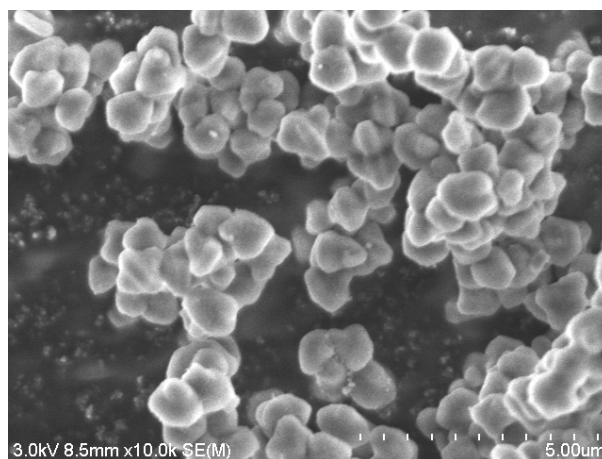

**Figure S2.** Scanning electron image of the sample Al-SBA-15.

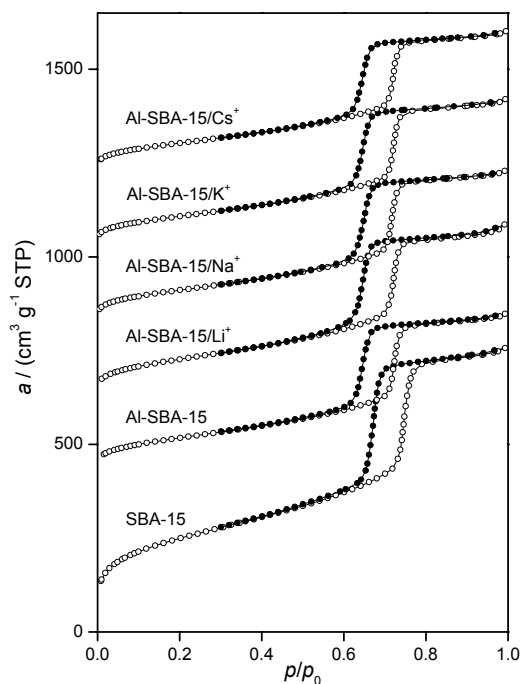

**Figure S3.** Nitrogen adsorption isotherms at  $-196\text{ }^{\circ}\text{C}$  for starting SBA-15 silica and modified samples. (The isotherms for modified samples are offset vertically by 400, 600, 800, 1000, and  $1200\text{ cm}^3/\text{g STP}$ .)

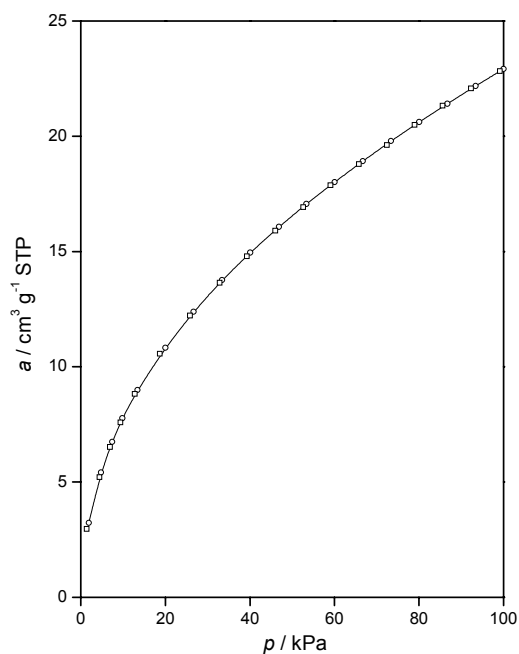

**Figure S4.** Adsorption isotherms of carbon dioxide at  $20\text{ }^{\circ}\text{C}$  on Al-SBA-15/Na<sup>+</sup> measured immediately after nitrogen isotherm (○) and after next five adsorption/desorption cycles (□).

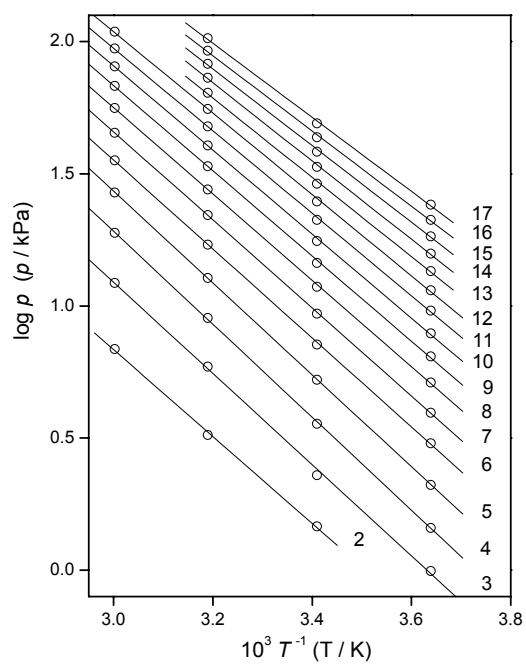

**Figure S5.** Adsorption isotherms of carbon dioxide on sample Al-SBA-15/ $K^+$ . Points were calculated by numerical interpolation, lines represent linear fit. All the isotherms are marked with corresponding amount adsorbed in  $\text{cm}^3 \text{g}^{-1}$  STP.
